# Supplementary material for: Anti-Alzheimer’s Natural Products Derived from Plant Endophytic Fungi
Source: MDPI journal article supplement (doi:10.3390/molecules28052259), 2023-02-28
Supplement: s1 [file s1]

**Table S1.** Alkaloids from endophytic fungi and their biological activities, metabolite class, fungus, host plant(s), reference.

| Metabolite Class      | Fungus                                             | Host Plant(s)                                                     | Compounds Isolated                       | Biological Target                     | Biological Activity                                | Reference |
|-----------------------|----------------------------------------------------|-------------------------------------------------------------------|------------------------------------------|---------------------------------------|----------------------------------------------------|-----------|
| Cytochalasans         | <i>Xylaria</i> sp.                                 | <i>Casearia sylvestris</i>                                        | Cytochalasins B (1)                      | AChE inhibitory activity              | Potent AChE inhibition at 60                       | 13        |
|                       |                                                    |                                                                   | Cytochalasin C (2)                       |                                       | µg                                                 |           |
|                       |                                                    |                                                                   | Cytochalasin D (3)                       |                                       | Inactive                                           |           |
|                       | <i>Aspergillus terreus</i>                         | <i>Artemisia annua</i>                                            | Cytochalasin E (4)                       | AChE inhibitory activity              | IC <sub>50</sub> , 146.1±6.5, 176.0±11.5, and      | 14        |
|                       |                                                    |                                                                   | 5,6-Dehydro-7-hydroxy cytochalasin E (5) |                                       | 110.9±13.7 µM, respectively                        |           |
|                       |                                                    |                                                                   | Δ6,12-Isomer of 5 (6)                    |                                       |                                                    |           |
|                       |                                                    |                                                                   | Rosellichalasin (7)                      |                                       | IC <sub>50</sub> > 200 µM                          |           |
|                       | <i>Phomopsis</i> sp.                               | <i>Senna spectabilis</i> (Fabaceae)                               | Cytochalasins J (8)                      | AChE inhibitory activity              | Inactive                                           | 15        |
|                       | <i>Phomopsis</i> sp.,<br><i>Phomopsis</i> IFB-E060 | <i>Senna spectabilis</i> (Fabaceae),<br><i>Vatica mangachapoi</i> | Cytochalasins H (9)                      | AChE inhibitory activity              | Minimum quantity of 25.0 µg                        | 15, 18    |
|                       | <i>Aspergillus flavipes</i>                        | <i>Hevea brasiliensis</i>                                         | Bisaspochalasin D (10)                   | Neurite growth activity of PC12 cells | Inducing a differentiation rate of 12.52% at 10 µM | 16        |
|                       |                                                    |                                                                   | Bisaspochalasin E (11)                   |                                       |                                                    |           |
|                       |                                                    |                                                                   | Aspochalasin D (12)                      |                                       | Inactive                                           |           |
|                       |                                                    |                                                                   | Aspochalasin B (13)                      |                                       |                                                    |           |
|                       | <i>Chaetomium globosum</i>                         | <i>Panax notoginseng</i>                                          | Chaetoglobosin A (14)                    | AChE inhibitory activity              | Inhibition rate < 10% at 50 µM                     | 17        |
| Chaetoglobosin B (15) |                                                    |                                                                   |                                          |                                       |                                                    |           |
| Chaetoglobosin E (16) |                                                    |                                                                   | Inactive                                 |                                       |                                                    |           |
| Chaetoglobosin F (17) |                                                    |                                                                   |                                          |                                       |                                                    |           |

|                              |                                  |                    |                                          |                                                                             |                                                                              |    |
|------------------------------|----------------------------------|--------------------|------------------------------------------|-----------------------------------------------------------------------------|------------------------------------------------------------------------------|----|
|                              |                                  |                    | Chaetoglobosin Fex (18)                  |                                                                             |                                                                              |    |
|                              |                                  |                    | Penochalasin F (19)                      |                                                                             |                                                                              |    |
|                              |                                  |                    | Penochalasin G (20)                      |                                                                             |                                                                              |    |
| Chaetomium globosum WQ       | Imperata cylindrical             |                    | Cytoglobosin A (21)                      |                                                                             | EC <sub>50</sub> , 0.879 mM, 472.87 mM, and 0.023 mM, respectively           | 18 |
|                              |                                  |                    | Penocha-lasin C (22)                     | Scavenging DPPH and ABTS activity,                                          | E <sub>max</sub> , 7.1%, 5.9% and 40.3%, respectively                        |    |
|                              |                                  |                    | Isochaetoglobosin D (23)                 | H <sub>2</sub> O <sub>2</sub> -induced PC12 cell damage inhibitory activity | EC <sub>50</sub> , 0.002 mM, 0.002 mM, and 0.009 mM, respectively            |    |
| Phomopsis IFB-E060           | sp.                              | Vatica mangachapoi | 18-Methoxycytochalasin J (24)            |                                                                             | EC <sub>50</sub> : 481.121 mM, 1.052 mM, and 0.004 mM, respectively          |    |
| Westerdykella nigra          | Avicennia marina (Forssk.) Vierh |                    | Westalsan (25)                           |                                                                             | IC <sub>50</sub> , 0.056±0.003, 0.088±0.005 and 0.140±0.007 μM, respectively | 19 |
|                              |                                  |                    | Phomacin B (26)                          | AChE inhibitory activity                                                    |                                                                              |    |
|                              |                                  |                    | 19-Hydroxy-19,20-dihydro phomacin C (27) |                                                                             |                                                                              |    |
| Diketopiperazine Derivatives | Acrostalagmus luteoalbus TK-43   | Codium fragile     | Acrozine A (28, 29)                      |                                                                             | IC <sub>50</sub> , 9.5, 60.7 and 130.5 μM, respectively                      | 20 |
|                              |                                  |                    | Acrozine B (30, 31)                      |                                                                             |                                                                              |    |
|                              |                                  |                    | Acrozine C (32, 33)                      |                                                                             |                                                                              |    |
|                              |                                  |                    | Acrozine D (34)                          | AChE inhibitory activity                                                    | Weak activity at 32 μM                                                       | 21 |
|                              |                                  |                    | Acrozine E (35)                          |                                                                             |                                                                              |    |
|                              |                                  |                    | Acrozine F (36)                          |                                                                             | IC <sub>50</sub> , 8.4 μM                                                    |    |
|                              |                                  |                    | Acrozine G (37)                          |                                                                             | Weak activity at 32 μM                                                       |    |
|                              |                                  |                    | Pseudellone D (38)                       |                                                                             |                                                                              |    |
|                              |                                  |                    | Lasiodipine E (39)                       | –                                                                           | –                                                                            |    |
| Chetoseminudin C (40)        |                                  |                    |                                          |                                                                             |                                                                              |    |

|                             |                              |  |                                                 |                                                      |                                 |    |
|-----------------------------|------------------------------|--|-------------------------------------------------|------------------------------------------------------|---------------------------------|----|
|                             |                              |  | Chetoseminudin B (41)                           |                                                      |                                 |    |
|                             |                              |  | T988 C (42)                                     |                                                      |                                 |    |
|                             |                              |  | T988 B (43)                                     |                                                      |                                 |    |
| <i>Aspergillus tetteus</i>  | <i>Artemisia annua</i>       |  | Acetylpoaranotin (44)                           | AChE inhibitory activity                             | IC <sub>50</sub> , 127.4±17.3µM | 14 |
| <i>Neosartorya fischeri</i> | <i>Glehnia littoralis</i>    |  | Cyclotryprostatin B (45)                        | Neuroprotective activity                             |                                 | 22 |
| <i>JS0553</i>               |                              |  | Fumitremorgin B (46)                            | against                                              | Obvious neuroprotection at 20   |    |
|                             |                              |  | Fumitremorgin A (47)                            | glutamate-mediated HT22 cell death.                  | µM                              |    |
|                             |                              |  | Fumitremorgin C (48)                            |                                                      |                                 |    |
|                             |                              |  | Brevianamide F (49)                             |                                                      |                                 |    |
|                             |                              |  | Spirotryprostatin A (50)                        |                                                      |                                 |    |
| <i>Talaromyces</i>          | sp.                          |  | 6-Methoxyspirotryprostatin B (51)               | AChE inhibitory activity                             | Inactive                        |    |
| <i>LGT-2</i>                | <i>Tripterygium wilfordi</i> |  | 3-Dehydroxymethylbisdet                         |                                                      |                                 | 23 |
|                             |                              |  | hio-3,10a-bis(methylthio)gliotoxin (52)         |                                                      |                                 |    |
|                             |                              |  | Bisdethiobis(methylthio)gliotoxin (53)          |                                                      | Weak activity                   |    |
|                             |                              |  | Didehydrobisdethiobis(methylthio)gliotoxin (54) | –                                                    | –                               |    |
| <i>Nigrospora</i>           |                              |  | Nigrosporaamide A (55)                          |                                                      |                                 |    |
| <i>camelliae-sinensis</i>   | <i>Lumnitzera littorea</i>   |  | Nigrosporaamide B (56)                          | H <sub>2</sub> O <sub>2</sub> -mediated cytotoxicity | Inactive at 100 µM              | 24 |
| <i>S30</i>                  |                              |  | Cyclo-(L-Pro-L-Phe) (57)                        | for HT22 cell                                        |                                 |    |
|                             |                              |  | Cyclo[L-(4-hydroxyprolinyl                      |                                                      |                                 |    |

|                                                                          |                                                                                 |                                       |                                                                       |                                                                            |        |                                      |
|--------------------------------------------------------------------------|---------------------------------------------------------------------------------|---------------------------------------|-----------------------------------------------------------------------|----------------------------------------------------------------------------|--------|--------------------------------------|
| l)-L-Leu] (58)                                                           |                                                                                 |                                       |                                                                       |                                                                            |        |                                      |
| <i>Nigrospora<br/>camelliae-sinensis</i><br>S30, <i>Penicillium</i> sp.1 | <i>Lumnitzera littorea</i> ,<br><i>Alibertia<br/>macrophylla</i><br>(Rubiaceae) | Cyclo-(L-Val-L-Pro) (59)              | AChE inhibitory activity                                              | A detection limit of 10.0 µg                                               | 24, 25 |                                      |
| <i>Nigrospora<br/>camelliae-sinensis</i> S30                             | <i>Alibertia<br/>macrophylla</i><br>(Rubiaceae)                                 | Cyclo-(L-Leu-L-Pro) (60)              | H <sub>2</sub> O <sub>2</sub> -mediated cytotoxicity<br>for HT22 cell | Inactive at 100 µM                                                         | 24     |                                      |
|                                                                          |                                                                                 | Cyclo-(R-Leu-R-Pro) (61)              |                                                                       |                                                                            |        |                                      |
|                                                                          |                                                                                 | Cyclo-(L-Ile-L-Pro) (62)              |                                                                       |                                                                            |        |                                      |
|                                                                          |                                                                                 | Cyclo-(4-methyl-R-Pro-S-N<br>va) (63) |                                                                       |                                                                            |        |                                      |
| <i>Colletotrichum<br/>gloeosporioides</i>                                | <i>Michelia champaca</i>                                                        | Cyclo-(S-Pro-S-Tyr) (64)              | AChE inhibitory activity                                              | Moderate activity at 200 µg                                                | 26     |                                      |
|                                                                          |                                                                                 | Cyclo-(S-Pro-S-Val) (65)              |                                                                       |                                                                            |        |                                      |
| <i>Colletotrichum<br/>crassipes</i>                                      | <i>Casearia sylvestris</i>                                                      | Cyclo(D)-Pro-(L)-Val (66)             | AChE inhibitory activity                                              | Inactive at 100 µg                                                         | 13     |                                      |
|                                                                          |                                                                                 | Cyclo(D)-Pro-(D)-Tyr (67)             |                                                                       |                                                                            |        |                                      |
|                                                                          |                                                                                 | Cyclo(D)-Val-(D)-Tyr (68)             |                                                                       |                                                                            |        |                                      |
|                                                                          |                                                                                 | Cyclo(D)-Hyp-(L)-Ile (69)             |                                                                       |                                                                            |        |                                      |
|                                                                          |                                                                                 | Cyclo(D)-Pro-(D)-Leu (70)             |                                                                       |                                                                            |        |                                      |
|                                                                          |                                                                                 | Cyclo(D)-Pro-(L)-Ile (71)             |                                                                       |                                                                            |        |                                      |
|                                                                          |                                                                                 | Cyclo(D)-Pro-(L)-Phe (72)             |                                                                       |                                                                            |        |                                      |
|                                                                          |                                                                                 | Cyclo(D)-Pro-(D)-Phe (73)             |                                                                       |                                                                            |        |                                      |
| Indole                                                                   |                                                                                 | 16α-Hydroxy-5N-acetylardeemin (74)    | AChE inhibitory activity                                              | IC <sub>50</sub> , 58.3±3.3, 149.4±11.3, and<br>116.9±3.7 µM, respectively | 14     |                                      |
| Alkaloids                                                                | <i>Aspergillus terreus</i>                                                      | <i>Artemisia annua</i>                |                                                                       |                                                                            |        | 5N-Acetylardeemin (75)               |
|                                                                          |                                                                                 |                                       |                                                                       |                                                                            |        | 15b-β-Hydroxy-5N-acetylardeemin (76) |
| <i>Colletotrichum</i>                                                    | <i>Michelia champaca</i>                                                        | 2-Phenylethyl                         | AChE inhibitory activity                                              | Moderate activity at 200 µg                                                | 26     |                                      |

|                                               |                                                              |  |                                  |                                                                                |                                                                                      |          |
|-----------------------------------------------|--------------------------------------------------------------|--|----------------------------------|--------------------------------------------------------------------------------|--------------------------------------------------------------------------------------|----------|
| <i>gloeosporioides</i>                        |                                                              |  | 1H-indol-3-yl-acetate (77)       |                                                                                |                                                                                      |          |
| <i>Penicillium chrysogenum</i> No. 005        | <i>Cistanche deserticola</i>                                 |  | Chrysogenamide A (78)            | Neuroprotection for H <sub>2</sub> O <sub>2</sub> -mediated SH-SY5Y cell death | Enhancing cell viability of 59.6% at 1×10 <sup>-4</sup> μM                           | 27       |
|                                               |                                                              |  | 9-Deacetylfumigaclavine C (79)   |                                                                                |                                                                                      |          |
| <i>Aspergillus fumigatus</i>                  | <i>Cynodon dactylon</i>                                      |  | 9-Deacetoxymumigaclavine C (80)  | Neurite outgrowth of PC12                                                      | Inactive                                                                             | 28       |
|                                               |                                                              |  | Fumigaclavine C (81)             |                                                                                |                                                                                      |          |
| <i>Neosartorya fischeri</i> JS0553            | <i>Glehnia littoralis</i>                                    |  | Aszonalenin (82)                 | Neuroprotection against glutamate-mediated HT22 cell death                     | Inactive                                                                             | 22       |
|                                               |                                                              |  | Acetylazonalenin (83)            |                                                                                |                                                                                      |          |
| <i>Alternaria alternate</i>                   | <i>Psidium littorale</i> Raddi                               |  | Alternatine A (84)               | PC12 cell injury induced by glutamate                                          | Inactive                                                                             | 29       |
| <i>Alternaria. Alternate/Epicoccum nigrum</i> | <i>Psidium littorale</i> Raddi/<br><i>Houttuynia cordata</i> |  | 1H-indole-3-carboxylic acid (85) | Scavenging DPPH and ABTS activity                                              | IC <sub>50</sub> , 88.97 μg/mL for DPPH, EC <sub>50</sub> , 21.48 ± 0.88 μM for ABTS | 29,30,31 |
| <i>Alternaria alternate</i>                   | <i>Psidium littorale</i> Raddi                               |  | Indole-3-methylethanoate (86)    | Neuroprotection on glutamate-mediated PC12 cell death                          | Cell viabilities improved with 75.6 ± 4.2% and 84.8 ± 6.5 at 40 and 80 μM            | 29       |
|                                               |                                                              |  | Colletotryptin A (87)            |                                                                                |                                                                                      |          |
|                                               |                                                              |  | Colletotryptin B (88)            |                                                                                |                                                                                      |          |
|                                               |                                                              |  | Colletotryptin C (89)            |                                                                                |                                                                                      |          |
| <i>Colletotrichum</i> sp. SC1355              | <i>Cleistocalyx operculatus</i>                              |  | Colletotryptin D (90)            | AChE inhibitory activity                                                       | Inactive at 50 μM                                                                    | 32       |
|                                               |                                                              |  | Colletotryptin E (91/92)         |                                                                                |                                                                                      |          |
|                                               |                                                              |  | Colletotryptin F (93)            |                                                                                |                                                                                      |          |

|                       |       |                                          |                                                        |                                                    |                                                                    |                             |    |
|-----------------------|-------|------------------------------------------|--------------------------------------------------------|----------------------------------------------------|--------------------------------------------------------------------|-----------------------------|----|
| Other<br>of Alkaloids | Types | <i>Colletotrichum gloeosporioides</i>    | <i>Michelia champaca</i>                               | Uracil (94)                                        | AChE inhibitory activity                                           | Moderate activity at 200 µg | 26 |
|                       |       |                                          |                                                        | 4-Hydroxy-benzamide (95)                           |                                                                    |                             |    |
|                       |       | <i>Botryosphaeria dothidea</i> KJ-1      | <i>Melia azedarach</i> L                               | 3-Hydroxy-2-methoxy-5-methylpyridin-2(1H)-one (96) |                                                                    |                             |    |
|                       |       | <i>Nigrospora camelliae-sinensis</i> S30 | <i>Lumnitzera littorea</i>                             | 5-(40-Hydroxybenzyl)hydantoin (97)                 | H <sub>2</sub> O <sub>2</sub> -mediated cytotoxicity for HT22 cell | Inactive                    | 24 |
|                       |       |                                          |                                                        | (±)-Oxypenicinoline (98/99)                        | A                                                                  |                             |    |
|                       |       |                                          |                                                        | (±)-Oxypenicinoline (100/101)                      | B                                                                  |                             |    |
|                       |       |                                          |                                                        | (±)-Oxypenicinoline (102/103)                      | C                                                                  |                             |    |
|                       |       |                                          |                                                        | (±)-Oxypenicinoline (104/105)                      | D                                                                  | Inactive                    |    |
|                       |       | <i>Penicillium steckii</i> SCSIO 41025   | <i>Avicennia. Marina</i> (Forsk.) Vierh (Trichomaceae) | Penicnoline F (106)                                | AChE inhibitory activity                                           |                             | 34 |
|                       |       |                                          |                                                        | Penicnoline G (107)                                |                                                                    |                             |    |
|                       |       |                                          |                                                        | 1,2,3,11b-Tetrahydroquinolactacide (108/109)       |                                                                    |                             |    |
|                       |       |                                          |                                                        | Quinolactacide (110)                               |                                                                    |                             |    |
|                       |       |                                          |                                                        | Penicnoline (111)                                  |                                                                    | IC <sub>50</sub> , 87.3 µM  |    |
|                       |       |                                          |                                                        | Methyl-penicnoline (112)                           |                                                                    | Inactive                    |    |
|                       |       |                                          |                                                        | Penicnoline E (113)                                |                                                                    | IC <sub>50</sub> , 68.5 µM  |    |
|                       |       |                                          |                                                        | Quinolonimide (114)                                |                                                                    | Inactive                    |    |
|                       |       |                                          |                                                        | 4-Oxo-1,4-dihydroquinolin                          |                                                                    |                             |    |

|                                            |                             |                            |                                  |                                                                  |                                                                                                      |    |
|--------------------------------------------|-----------------------------|----------------------------|----------------------------------|------------------------------------------------------------------|------------------------------------------------------------------------------------------------------|----|
|                                            |                             |                            | e-3-carboxamide (115)            |                                                                  |                                                                                                      |    |
|                                            |                             |                            | Huptremule A (116)               |                                                                  |                                                                                                      |    |
|                                            |                             |                            | Huptremule B (117)               |                                                                  |                                                                                                      |    |
| <i>Ceriporia lacerate</i><br>HS-ZJUT-C13A  | <i>Huperzia Serrata</i>     |                            | Huptremule C (118)               | AChE inhibitory activity                                         | IC <sub>50</sub> , 0.99±0.03, 2.17±0.05,<br>0.11±0.01, 0.06±0.00, and<br>12.11±0.34 μM, respectively | 35 |
|                                            |                             |                            | Huptremule D (119)               |                                                                  |                                                                                                      |    |
|                                            |                             |                            | 8α,15α-Epoxyhuperzine A<br>(120) |                                                                  |                                                                                                      |    |
|                                            |                             |                            |                                  |                                                                  |                                                                                                      |    |
| <i>Aspergillus terreus</i><br>(No. GX7-3B) | <i>Bruguiera gymnoihiza</i> |                            | 8-O-methylbostrycoidin<br>(121)  | AChE inhibitory activity                                         | IC <sub>50</sub> , 6.71 μM                                                                           | 36 |
| <i>Fusarium</i> sp. HP-2                   | Chinese<br>"Qi-Nan"         | agarwood                   | Lumichrome (122)                 | AChE inhibitory activity                                         | Inactive at 50 μM                                                                                    | 37 |
| <i>Phomopsis</i> sp. xy21                  | Thai                        | <i>Xylocarpus granatum</i> | Phomopsol A (123)                | Neuroprotection<br>corticosterone-mediated<br>PC12 cell injury   | Cell viabilities of 76% at 40.0<br>μM                                                                | 38 |
| <i>Aspergillus fumigatus</i>               | <i>Cynodon dactylon</i>     |                            | 14-Norpseurotin (124)            | Inducing neurite<br>outgrowth                                    | Promoting neurite<br>outgrowth of PC12 at 10.0 μM                                                    | 28 |
|                                            |                             |                            | Pseurotin A (125)                |                                                                  |                                                                                                      |    |
| <i>Neosartorya fischeri</i><br>JS0553      | <i>Glehnia littoralis</i>   |                            | Fischerin (126)                  | Neuroprotection against<br>glutamate-mediated HT22<br>cell death | 100% cell viability at 5 μM                                                                          | 22 |
|                                            |                             |                            | Pyripyropene A (127)             |                                                                  | Inactive                                                                                             |    |
| <i>Penicillium</i> sp.<br>JVF17            | <i>Vitex rotundifolia</i>   |                            | Penazaphilone E (128)            | Neuroprotection against<br>glutamate-mediated HT22<br>cell death | Neuroprotective activities with<br>almost 100% at 25 μM                                              | 39 |
|                                            |                             |                            | Isochromophilone VI (129)        |                                                                  |                                                                                                      |    |
|                                            |                             |                            | Peniazaphilone D (130)           |                                                                  |                                                                                                      |    |
| <i>Cochliobolus lunatus</i>                |                             |                            | Sinulariapeptide A (131)         | AChE inhibitory activity                                         | IC <sub>50</sub> , 1.8 ± 0.12 and 1.3 ± 0.11                                                         | 40 |

|                    |              |                              |                          |                          |                            |    |  |
|--------------------|--------------|------------------------------|--------------------------|--------------------------|----------------------------|----|--|
|                    |              |                              |                          |                          |                            |    |  |
| SCSIO41401         |              |                              | Sinulariapeptide B (132) |                          | μM, respectively           |    |  |
| <i>Rhizopycnis</i> | <i>vagum</i> | <i>Nicotiana tabacum</i>     | Rhizovagine A (133)      | AChE inhibitory activity | IC <sub>50</sub> , 43.1 μM | 41 |  |
| Nitaf22            |              |                              |                          |                          |                            |    |  |
| <i>Talaromyces</i> | sp.          | <i>Tripterygium wilfordi</i> | Pseurotin A1 (134)       | AChE inhibitory activity | Weaker                     | 23 |  |
| LGT-2              |              |                              | Pseurotin A2 (135)       |                          |                            |    |  |

“\_” not test. IC<sub>50</sub>, half maximal effective concentration; EC<sub>50</sub>, half effective concentration; E<sub>max</sub>, maximum effect; AChE, acetylcholinesterase; DPPH, 2,2-diphenyl-1-picrylhydrazyl; ABTS, 2,2-azino-bis(3-ethylbenzothiazoline-6-sulfonic acid) diammonium salt.
