# Supplementary material for: Anti-Alzheimer’s Natural Products Derived from Plant Endophytic Fungi
Source: MDPI journal article supplement (doi:10.3390/molecules28052259), 2023-02-28
Supplement: s1 [file s1]

**Table S4.** Terpenes from endophytic fungi and their biological activities, metabolite class, fungus, host plant(s), reference.

| Metabolite Class                 | Fungus                              | Host Plant(s)                  | Compounds Isolated                                   | Biological Target                                           | Biological Activity                             | Reference                                                                   |    |
|----------------------------------|-------------------------------------|--------------------------------|------------------------------------------------------|-------------------------------------------------------------|-------------------------------------------------|-----------------------------------------------------------------------------|----|
| Sesquiterpenoids                 | <i>Aspergillus</i> 085242           | sp.                            | Asperterpenol A (362)                                | AChE inhibitory activity                                    | IC <sub>50</sub> : 2.3 and 3.0 μM, respectively | 83                                                                          |    |
|                                  |                                     |                                | Asperterpenol B (363)                                |                                                             |                                                 |                                                                             |    |
|                                  | <i>Alternaria alternata</i>         | <i>Psidium littorale</i> Raddi | (1R,5R,6R,7R,10S)-1,6-Dihroxyeu desm-4(15)-ene (364) | Neuroprotection against glutamate induced-PC12 cells injury | Inactive at 40 μM and 80 μM                     | 29                                                                          |    |
|                                  | <i>Paecilomyces</i> TE-540          | sp.                            | <i>Nicotiana tabacum</i> L                           | Paecilacadinol A (365)                                      | AChE inhibitory activity                        | Inhibition rates: 27.05%, 34.23%, 27.29%, and 42.35% at 40 μM, respectively | 84 |
|                                  |                                     |                                |                                                      | Paecilacadinol B (366)                                      |                                                 |                                                                             |    |
|                                  |                                     |                                |                                                      | Ustusol D (367)                                             |                                                 |                                                                             |    |
|                                  |                                     |                                |                                                      | Ustusol E (368)                                             |                                                 |                                                                             |    |
|                                  |                                     |                                |                                                      | 12-Hydroxyalbrassitriol (369)                               |                                                 | IC <sub>50</sub> : 43.02 ± 6.01 and 35.97 ± 2.12 μM, respectively           |    |
|                                  |                                     |                                |                                                      | 2-Hydroxyalbrassitriol (370)                                |                                                 |                                                                             |    |
|                                  |                                     |                                |                                                      | Deoxyuvidin B (371)                                         |                                                 | Inhibition rates: 19.23%, 33.04%, 17.56%, and 24.24% at 40 μM, respectively |    |
|                                  |                                     |                                |                                                      | 3β,9α,11-Trihydroxy-6-oxodrim-7-ene (372)                   |                                                 |                                                                             |    |
|                                  |                                     |                                |                                                      | 2α,11-Dihydroxy-6-ox-odrim-7-ene (373)                      |                                                 |                                                                             |    |
|                                  |                                     |                                |                                                      | Ustusol B (374)                                             |                                                 |                                                                             |    |
| <i>Pseudofusicoccum</i> sp. J003 | <i>Sonneratia apetala</i> Buch.-Ham | Acorenone C (375)              | AChE inhibitory activity                             | Inhibition rate of 23.34% at 50 μM                          | 85                                              |                                                                             |    |
| <i>Nemania bipapillata</i>       | <i>Asparagopsis taxiformis</i> -    | (+)-(2R,4S,5R,8S)-(376)        | AChE and BChE                                        | Inhibition rates of 19.9%                                   | 86                                              |                                                                             |    |

|                                                                                    |                              |                                                                                                       |                           |                                                                                                                                                                                                         |    |
|------------------------------------------------------------------------------------|------------------------------|-------------------------------------------------------------------------------------------------------|---------------------------|---------------------------------------------------------------------------------------------------------------------------------------------------------------------------------------------------------|----|
| (AT-05)                                                                            | <i>Falkenbergia</i>          | (+)-(2 <i>R</i> ,4 <i>R</i> ,5 <i>R</i> ,8 <i>S</i> )-4-Deacetyl-5-hydroxy-botryenalol ( <b>377</b> ) | inhibitory activity       | and 14.1% for <b>376</b> , 18.3% and 6.7% for <b>377</b> , 21.1% and 5.5% for <b>378</b> , 27.7% and 7.3% for <b>379</b> , 22.8% and 5.1% for <b>380</b> , 19.6% and 3.2% for <b>381</b> , respectively |    |
|                                                                                    |                              | (+)-(2 <i>R</i> ,4 <i>S</i> ,5 <i>R</i> ,8 <i>R</i> )-4-Deacetyl-botryenalol ( <b>378</b> )           |                           |                                                                                                                                                                                                         |    |
|                                                                                    |                              | (+)-(2 <i>R</i> ,4 <i>R</i> ,8 <i>R</i> )-( <b>379</b> )                                              |                           |                                                                                                                                                                                                         |    |
|                                                                                    |                              | (+)-(2 <i>R</i> ,4 <i>S</i> ,8 <i>S</i> )-( <b>380</b> )                                              |                           |                                                                                                                                                                                                         |    |
|                                                                                    |                              | 4 $\beta$ -Acetoxy-9 $\beta$ ,10 $\beta$ ,15 $\alpha$ -trihydroxyprobotrydial ( <b>381</b> )          |                           |                                                                                                                                                                                                         |    |
| <i>Xylaria</i> sp.<br>HNWSW-2                                                      |                              | Guaidiol ( <b>382</b> )                                                                               | AChE inhibitory activity  | Inhibition rate of 12.9% at 50 $\mu$ g/mL                                                                                                                                                               | 46 |
| <i>Nigrospora oryzae</i>                                                           | <i>Irpex lacteus</i>         | Nigrosirpexin A ( <b>383</b> )                                                                        | AChE inhibitory activity  | Inhibition rate of 35% at 50 $\mu$ M                                                                                                                                                                    | 87 |
| <i>Colletotrichum gloeosporioides</i> GT-7                                         | <i>Uncaria rhynchophylla</i> | Colletotrichine A ( <b>384</b> )                                                                      | AChE inhibitory activity  | IC <sub>50</sub> , 28 $\mu$ g/mL                                                                                                                                                                        | 88 |
| co-culture of the<br><i>Armillaria</i> sp. and<br><i>Epicoccum</i> sp.<br>YUD17002 |                              | Epicoterpene A ( <b>385</b> )                                                                         |                           |                                                                                                                                                                                                         |    |
|                                                                                    |                              | Epicoterpene B ( <b>386</b> )                                                                         |                           |                                                                                                                                                                                                         |    |
|                                                                                    |                              | Epicoterpene C ( <b>387</b> )                                                                         | AChE inhibitory activity  | Inactive at 50 $\mu$ M                                                                                                                                                                                  | 47 |
|                                                                                    |                              | Epicoterpene D ( <b>388</b> )                                                                         |                           |                                                                                                                                                                                                         |    |
|                                                                                    |                              | Epicoterpene E ( <b>389</b> )                                                                         |                           |                                                                                                                                                                                                         |    |
| <i>Phomopsis</i> sp.<br>TJ507A                                                     | <i>Phyllanthus glaucus</i>   | Phomophyllin A ( <b>390</b> )                                                                         |                           |                                                                                                                                                                                                         |    |
|                                                                                    |                              | Phomophyllin B ( <b>391</b> )                                                                         |                           |                                                                                                                                                                                                         |    |
|                                                                                    |                              | Phomophyllin C ( <b>392</b> )                                                                         | BACE1 inhibitory activity | Inhibition rates of 43%, 35%, 20%, 40%, 35%, 40%, and 20% at 40 $\mu$ M, respectively                                                                                                                   | 89 |
|                                                                                    |                              | Phomophyllin D ( <b>393</b> )                                                                         |                           |                                                                                                                                                                                                         |    |
|                                                                                    |                              | Phomophyllin E ( <b>394</b> )                                                                         |                           |                                                                                                                                                                                                         |    |
|                                                                                    |                              | Phomophyllin F ( <b>395</b> )                                                                         |                           |                                                                                                                                                                                                         |    |

|                |                                            |                         |  |                                                |                          |                                                                                                |        |
|----------------|--------------------------------------------|-------------------------|--|------------------------------------------------|--------------------------|------------------------------------------------------------------------------------------------|--------|
|                |                                            |                         |  | Phomophyllin G (396)                           |                          |                                                                                                |        |
|                |                                            |                         |  | Phomophyllin H (397)                           |                          | Inactive                                                                                       |        |
|                |                                            |                         |  | Phomophyllin I (398)                           |                          | Inhibition rate about 40% at 40 $\mu$ M.                                                       |        |
|                |                                            |                         |  | Phomophyllin J (399)                           |                          | Inactive                                                                                       |        |
|                |                                            |                         |  | Phomophyllin K (400)                           |                          |                                                                                                |        |
|                |                                            |                         |  | Phomophyllin L (401)                           |                          | Inhibition rates about 3%, 5%, 5%, 40%, 2%, 2%, and 43% at 40 $\mu$ M, respectively            |        |
|                |                                            |                         |  | Phomophyllin M (402)                           |                          |                                                                                                |        |
|                |                                            |                         |  | Phomophyllin N (403)                           |                          |                                                                                                |        |
|                |                                            |                         |  | Granulone B (404)                              |                          |                                                                                                |        |
|                |                                            |                         |  | Radulone B (405)                               |                          |                                                                                                |        |
|                |                                            |                         |  | 2-(2,2,4,6-Tetramethylindan-5-yl)ethanol (406) |                          |                                                                                                |        |
|                |                                            |                         |  | Pterodin Z (407)                               |                          |                                                                                                |        |
|                |                                            |                         |  | Onitin (408)                                   |                          | Inactive                                                                                       |        |
|                |                                            |                         |  | Dehydrobotrydienol (409)                       |                          |                                                                                                |        |
|                |                                            |                         |  | 7-Hydroxy-10-oxodehydrodihydrobotrydial (410)  |                          | Inhibition rate about 42% at 40 $\mu$ M.                                                       |        |
| Meroterpenoids | <i>Colletotrichum gloeosporioides</i> GT-7 | <i>U. rhynchophylla</i> |  | Colletotrichine B (411)                        | AChE inhibitory activity | IC <sub>50</sub> , 38.0 $\mu$ g/mL                                                             | 90     |
|                | <i>Colletotrichum</i> sp. SCSIO KcB3-2     | <i>Kandelia candel</i>  |  | Bisabolanoic acid A (412)                      | AChE inhibitory activity | IC <sub>50</sub> , 2.2 $\mu$ M                                                                 | 91     |
|                | <i>Penicillium</i> sp. sk5GW1L             | <i>Kandelia candel</i>  |  | Arigsugacin I (413)                            | AChE inhibitory activity | IC <sub>50</sub> : 0.64, 0.37, 7.03, 38.23, 53.39, 3.03, 0.23, and 0.028 $\mu$ M, respectively | 92, 93 |
|                |                                            |                         |  | Arigsugacin F (414)                            |                          |                                                                                                |        |
|                |                                            |                         |  | Territrem B (415)                              |                          |                                                                                                |        |

|                                 |                                                       |                                          |                                    |                                     |                                                                                                                                                                                                        |    |
|---------------------------------|-------------------------------------------------------|------------------------------------------|------------------------------------|-------------------------------------|--------------------------------------------------------------------------------------------------------------------------------------------------------------------------------------------------------|----|
|                                 |                                                       |                                          | 3-Epiarigsugacin E (416)           |                                     |                                                                                                                                                                                                        |    |
|                                 |                                                       |                                          | Arisugacin D (417)                 |                                     |                                                                                                                                                                                                        |    |
|                                 |                                                       |                                          | Arisugacin B (418)                 |                                     |                                                                                                                                                                                                        |    |
|                                 |                                                       |                                          | Territrem C (419)                  |                                     |                                                                                                                                                                                                        |    |
|                                 |                                                       |                                          | Terreulactone C (420)              |                                     |                                                                                                                                                                                                        |    |
| <i>Aspergillus terreus</i> Thom | <i>Tripterygium wilfordii</i> Hook. f. (Celastraceae) | BACE1 and AChE inhibitory activities     | Spiroterreusnoid A (421)           | 94                                  | IC <sub>50</sub> : 5.86 and 22.18 μM for 421, 25.55 and 27.36 μM for 422, 21.24 and 23.87 μM for 423, 24.98 and 26.85 μM for 424, 27.16 and 32.51 μM for 425, 25.36 and 31.33 μM for 426, respectively |    |
|                                 |                                                       |                                          | Spiroterreusnoid B (422)           |                                     |                                                                                                                                                                                                        |    |
|                                 |                                                       |                                          | Spiroterreusnoid C (423)           |                                     |                                                                                                                                                                                                        |    |
|                                 |                                                       |                                          | Spiroterreusnoid D (424)           |                                     |                                                                                                                                                                                                        |    |
|                                 |                                                       |                                          | Spiroterreusnoid E (425)           |                                     |                                                                                                                                                                                                        |    |
|                                 |                                                       |                                          | Spiroterreusnoid F (426)           |                                     |                                                                                                                                                                                                        |    |
| <i>Aspergillus</i> 16-5c        | <i>Sonneratia apetala</i>                             | AChE inhibitory activity                 | 2-Hydro-acetoxydehydroaustin (427) | 95                                  | IC <sub>50</sub> > 50 μM                                                                                                                                                                               |    |
|                                 |                                                       |                                          | 11-Acetoxyisoaustinone (428)       |                                     |                                                                                                                                                                                                        |    |
|                                 |                                                       |                                          | Isoaustinol (429)                  |                                     |                                                                                                                                                                                                        |    |
|                                 |                                                       |                                          | Austin (430)                       |                                     |                                                                                                                                                                                                        |    |
|                                 |                                                       |                                          | Austinol (431)                     |                                     |                                                                                                                                                                                                        |    |
|                                 |                                                       |                                          | Acetoxydehydroaustin (432)         |                                     |                                                                                                                                                                                                        |    |
|                                 |                                                       |                                          | Dehydroaustin (433)                |                                     |                                                                                                                                                                                                        |    |
|                                 |                                                       |                                          | Dehydroaustinol (434)              |                                     |                                                                                                                                                                                                        |    |
|                                 |                                                       |                                          | Preaustinoid A2 (435)              |                                     |                                                                                                                                                                                                        |    |
|                                 |                                                       | 1,2-Dihydro-acetoxydehydroaustin B (436) | IC <sub>50</sub> > 50 μM           |                                     |                                                                                                                                                                                                        |    |
| Diterpenoids                    | <i>Penicillium chrysogenum</i> MT-12                  | <i>Huperzia serrata</i>                  | Penicichrysogene A (437)           | AChE and BChE inhibitory activities | Inactive at 100 μM                                                                                                                                                                                     | 96 |

|                             |                      |                     |                                             |                      |    |
|-----------------------------|----------------------|---------------------|---------------------------------------------|----------------------|----|
|                             |                      |                     |                                             |                      |    |
|                             |                      |                     |                                             |                      |    |
| Penicichryso-gene B (438)   |                      |                     |                                             |                      |    |
| <i>Aspergillus</i> sp. YXf3 | <i>Ginkgo biloba</i> | Aspergiloid I (439) | Anti-oxidant and AChE inhibitory activities | Inactive at 50 µg/mL | 97 |

IC<sub>50</sub>, half maximal effective concentration; AChE, acethylcholinesterase; BChE, Butyrylcholinesterase.
