# Supplementary material for: Anti-Alzheimer’s Natural Products Derived from Plant Endophytic Fungi
Source: MDPI journal article supplement (doi:10.3390/molecules28052259), 2023-02-28
Supplement: s1 [file s1]

**Table S3.** Polyketides from endophytic fungi and their biological activities, metabolite class, fungus, host plant(s), reference.

| Metabolite Class | Fungus                            | Host Plant(s)                            | Compounds Isolated                             | Biological Target                    | Biological Activity                    | Reference |
|------------------|-----------------------------------|------------------------------------------|------------------------------------------------|--------------------------------------|----------------------------------------|-----------|
| Simple pyranones | <i>Aspergillus versicolor</i> Y10 | <i>Huperzia serrata</i>                  | Avertoxin A (145)                              | AChE inhibitory activity             | Inactive                               | 45        |
|                  |                                   |                                          | Avertoxin B (146)                              |                                      | IC <sub>50</sub> , 0.6 μM              |           |
|                  |                                   |                                          | Avertoxin C (147)                              |                                      |                                        |           |
|                  |                                   |                                          | Avertoxin D (148)                              |                                      | Inactive                               |           |
|                  |                                   |                                          | Asteltoxin (149)                               |                                      |                                        |           |
|                  | <i>Xylaria</i> HNWSW-2            | sp. <i>Xylocarpus granatum</i>           | Astropyrone (150)                              | AChE inhibitory activity             | Inhibition rates of 10.4% at 50 μg/mL  | 46        |
|                  | <i>Bipolaris</i> LK12             | <i>sorokiniana</i> <i>Rhazya stricta</i> | Bipolarisenol (151)                            | AChE inhibitory activity             | IC <sub>50</sub> , 67.23 ± 5.12 μg/mL  | 47        |
|                  | <i>Botryosphaeria</i> KJ-1        | <i>dothidea</i> <i>Melia azedarach</i> L | Pycnophorin (152)                              | DPPH radical-scavenging              | free Scavenging rate of 22.5% at 50 μM | 34        |
|                  | <i>Chaetomium globosum</i>        | <i>Panax notoginseng</i>                 | Chaetomugilin A (153)                          | DPPH radical-scavenging              | free EC <sub>50</sub> >100 μg/mL       | 17        |
|                  |                                   |                                          | Chaetomugilin D (154)                          |                                      |                                        |           |
| Benzopyrones     | <i>Xylomelasma</i> Samif07        | sp. <i>Salvia miltiorrhiza</i> Bunge     | Hydroxylchromone (155)                         | Hydroxyl radical-scavenging activity | Inactive                               | 48        |
|                  |                                   |                                          | 6-Hydroxymethyleugenin (156)                   |                                      |                                        |           |
|                  |                                   |                                          | 6-Methoxymethyleugenin (157)                   |                                      |                                        |           |
|                  |                                   |                                          | Chaetoquadrin D (158)                          |                                      | EC <sub>50</sub> , 15.1 μg/mL          |           |
|                  |                                   |                                          | Isoeugenitol (159)                             |                                      |                                        |           |
|                  |                                   |                                          | Diaporthin (160)                               |                                      |                                        |           |
|                  |                                   |                                          | 8-Hydroxy-6-methoxy-3-methyli socoumarin (161) |                                      | Inactive                               |           |
|                  |                                   |                                          | 6-Methoxymellein (162)                         |                                      |                                        |           |

|                                                                        |                                                                                                    |                                                              |                          |                                                                   |            |
|------------------------------------------------------------------------|----------------------------------------------------------------------------------------------------|--------------------------------------------------------------|--------------------------|-------------------------------------------------------------------|------------|
|                                                                        |                                                                                                    | (R)-6-Hydroxymellein (163)                                   | AChE inhibitory activity | IC <sub>50</sub> > 100 μM                                         | 49         |
| <i>Phaeosphaeria</i> sp. LF5                                           | <i>Huperzia. serrata</i>                                                                           | 6,8-Dihydroxy-3-(10R, 20R-Dihydroxypropyl)-isocoumarin (164) |                          |                                                                   |            |
|                                                                        |                                                                                                    | 6-Dydroxy-8-methoxy-3-methylisocoumarin (165)                |                          |                                                                   |            |
|                                                                        |                                                                                                    | De-O-methyldiaporthin (166)                                  |                          | IC <sub>50</sub> , 21.18 μM                                       |            |
| <i>Penicillium</i> sp.2/<br><i>Hyalodendriella</i> sp.<br>Ponipodef 12 | <i>Alibertia macrophylla</i> (Rubiaceae)/<br><i>Populus deltoides</i> Marsh × <i>P. nigra</i> L. L | 4-Dydroxymellein (167)                                       | AChE inhibitory activity | MIC, 30 μg                                                        | 25, 50     |
| <i>Penicillium</i> sp.2                                                | <i>Alibertia macrophylla</i> (Rubiaceae)                                                           | 8-Methoxymellein (168)<br>5-Hydroxymellein (169)             |                          | MIC > 100 μg                                                      | 25         |
| <i>Hyalodendriella</i> sp.<br>Ponipodef 12                             | 'Neva' of <i>Populus deltoides</i> Marsh × <i>P. nigra</i> L. L                                    | Palmariol B (170)                                            | AChE inhibitory activity | IC <sub>50</sub> : 115.31, 135.52, and 10.3.7 μg/mL, respectively | 50, 51     |
|                                                                        |                                                                                                    | Alternariol 9-methyl ether (171)                             |                          |                                                                   |            |
|                                                                        |                                                                                                    | Botrallin (172)                                              |                          | IC <sub>50</sub> > 200 μg/mL                                      | 50, 51, 52 |
|                                                                        |                                                                                                    | Hyalodendriol A (173)                                        |                          |                                                                   |            |
|                                                                        |                                                                                                    | Hyalodendriol B (174)                                        |                          | IC <sub>50</sub> , 21.1 μg/mL                                     |            |
|                                                                        |                                                                                                    | Hyalodendriol C (175)                                        |                          |                                                                   |            |
|                                                                        |                                                                                                    | Rhizopycnin D (176)                                          |                          | IC <sub>50</sub> > 200 μg/mL                                      | 50, 51     |
|                                                                        |                                                                                                    | Penicilliumolide D (177)                                     |                          |                                                                   |            |
|                                                                        |                                                                                                    | TMC-264 (178)                                                |                          | IC <sub>50</sub> : 89.7 and 49.6 μg/mL, respectively              |            |
|                                                                        |                                                                                                    | Penicilliumolide B (179)                                     |                          |                                                                   |            |
|                                                                        |                                                                                                    | Alternariol (180)                                            |                          | IC <sub>50</sub> > 200 μg/mL                                      |            |
|                                                                        |                                                                                                    | Graphislactone A (181)                                       |                          |                                                                   |            |

|                                     |                                                                            |                                                  |                                                       |                                                                                                    |    |
|-------------------------------------|----------------------------------------------------------------------------|--------------------------------------------------|-------------------------------------------------------|----------------------------------------------------------------------------------------------------|----|
| <i>Microsphaeropsis olivacea</i>    | <i>Pilgerodendron uviferum</i> (D. Don) Florin ("Cipres de las Guaitecas") | Graphislactone A ( <b>182</b> )                  | AChE inhibitory activity                              | IC <sub>50</sub> , 8.1, 88, and 27µg/mL, respectively                                              | 52 |
|                                     |                                                                            | Graphislactone A diacetate ( <b>183</b> )        |                                                       |                                                                                                    |    |
|                                     |                                                                            | Botrallin diacetate ( <b>184</b> )               |                                                       |                                                                                                    |    |
| <i>Colletotrichum</i> sp. CRI535-02 | <i>Piperornatum</i>                                                        | Monocerin ( <b>185</b> )                         | DPPH scavenging activity, ORAC antioxidant activity   | DPPH, IC <sub>50</sub> > 324 µM, ORAC, 10.8 ORAC unit                                              | 53 |
|                                     |                                                                            | Monocerin demethylated derivative ( <b>186</b> ) |                                                       | DPPH, IC <sub>50</sub> = 23.4 µM, ORAC, 11.5 ORAC unit                                             |    |
|                                     |                                                                            | Fusarentin 6,7-dimethyl ether ( <b>187</b> )     |                                                       | DPPH, IC <sub>50</sub> > 322 µM, ORAC, 14.4 ORAC unit                                              |    |
|                                     |                                                                            | Fusarentin 6-methyl ether ( <b>188</b> )         |                                                       | DPPH, IC <sub>50</sub> = 16.4 µM, ORAC, 1.4 ORAC unit                                              |    |
|                                     |                                                                            | Fusarentin derivative ( <b>189</b> )             |                                                       | DPPH, IC <sub>50</sub> > 306 µM, ORAC, 1.4 ORAC unit                                               |    |
|                                     |                                                                            | Phthalide ( <b>190</b> )                         |                                                       | DPPH, IC <sub>50</sub> > 324 µM, ORAC, 2.4 ORAC unit                                               |    |
| <i>Penicillium brefeldianum</i> F4a | <i>Houttuynia cordata</i>                                                  | Penialidin A ( <b>191</b> )                      | ABTS <sup>+</sup> scavenging activity                 | EC <sub>50</sub> , 14.54 ± 0.46 µM                                                                 | 31 |
|                                     |                                                                            | Penialidin F ( <b>192</b> )                      | DPPH and ABTS <sup>+</sup> scavenging activity        | EC <sub>50</sub> , 28.42 ± 3.16 and 7.61 ± 0.46µM, respectively                                    |    |
|                                     |                                                                            | Myxotrichin C ( <b>193</b> )                     |                                                       | EC <sub>50</sub> , 30.07 ± 2.83 and 14.96 ± 2.57µM, respectively                                   |    |
| <i>Phomopsis</i> sp. 33#.           | <i>Rhizophora stylosa</i>                                                  | Phomopsichin A ( <b>194</b> )                    | AChE inhibitory activity and DPPH scavenging activity | AChE inhibitory rates: 38.4%, 2.7%, 9.1% and 11.3% at 250 µM, respectively. DPPH inhibitory rates: | 54 |
|                                     |                                                                            | Phomopsichin B ( <b>195</b> )                    |                                                       |                                                                                                    |    |
|                                     |                                                                            | Phomopsichin C ( <b>196</b> )                    |                                                       |                                                                                                    |    |
|                                     |                                                                            | Phomopsichin D ( <b>197</b> )                    |                                                       |                                                                                                    |    |

|                             |                                   |                                       |                                                          |                                                         |    |
|-----------------------------|-----------------------------------|---------------------------------------|----------------------------------------------------------|---------------------------------------------------------|----|
|                             |                                   |                                       |                                                          | 18.0%, 25.3%, 52.0% , and 17.0% at 1 mM, respectively   |    |
|                             |                                   | Phomoxanthone A (198)                 | DPPH scavenging activity                                 | Inhibitory rate of 40% at 1mM                           |    |
| <i>Penicillium</i> sp. FJ-1 | <i>Acanthus ilicifolius</i> Linn. | (2R,3S)-Pinobanksin-3-cinnamate (199) | Neuroprotection on corticosterone-damaged PC12 cells     | Increasing the viability of cells                       | 55 |
| <i>Alternaria</i> sp        | <i>Maianthemum bifolium</i>       | Bialternacin A (200)                  | AChE inhibitory activity                                 | Inactive                                                | 56 |
|                             |                                   | Bialternacin E (201)                  |                                                          | IC <sub>50</sub> , 15.5 μM                              |    |
|                             |                                   | Bialternacin F (202)                  |                                                          | Inactive                                                |    |
| Pyranyl derivatives         |                                   | Peniaphilone A (203)                  | Neuroprotection on glutamate-induced HT22 cells injuries | Inactive                                                | 39 |
|                             |                                   | Peniaphilone B (204)                  |                                                          | -                                                       |    |
|                             |                                   | Peniaphilone C (205)                  |                                                          | Recovering cell vialibity more than 80% at 25 and 50 μM |    |
|                             |                                   | Peniaphilone D (206)                  |                                                          | Inactive                                                |    |
|                             |                                   | Peniaphilone E (207)                  |                                                          |                                                         |    |
|                             |                                   | Peniaphilone F (208)                  |                                                          | Recovering more than 80% at 25 and 50 μM                |    |
|                             |                                   | Dechloroisochromophilone III (209)    |                                                          | Showing protective effects at 50 μM                     |    |
|                             |                                   | Peniaphilone G (210)                  |                                                          | Inactive                                                |    |
|                             |                                   | Peniaphilone H (211)                  |                                                          |                                                         |    |
|                             |                                   | Peniaphilone I (212)                  |                                                          |                                                         |    |
|                             |                                   |                                       |                                                          | Isochromophilone V (213)                                |    |

|                                         |                                                      |                                                             |                                                      |                                                                     |                                                               |                                                         |
|-----------------------------------------|------------------------------------------------------|-------------------------------------------------------------|------------------------------------------------------|---------------------------------------------------------------------|---------------------------------------------------------------|---------------------------------------------------------|
| <i>Penicillium chermesinum</i> (ZH4-E2) | <i>Kandelia candel</i>                               | Chermesinone A (214)                                        | AChE inhibitory activity                             | IC <sub>50</sub> > 100 μM                                           | 57                                                            |                                                         |
|                                         |                                                      | Chermesinone B (215)                                        |                                                      |                                                                     |                                                               |                                                         |
|                                         |                                                      | Chermesinone C (216)                                        |                                                      |                                                                     |                                                               |                                                         |
| <i>Saccharicola</i> sp.                 | <i>Eugenia jambolana</i>                             | 2,2-Dimethyl-2H-chromene-6-carboxylic acid (217)            | huAChE-ICER and eeAChE-ICER inhibition activities    | Inactive<br>IC <sub>50</sub> , 0.037 ± 0.01 and 0.026 ± 0.005 mg/mL | 58                                                            |                                                         |
|                                         |                                                      | <i>trans</i> -3,4-Dihydro-3,4-dihydroxy-anofinic acid (218) |                                                      |                                                                     |                                                               |                                                         |
| Quinones                                |                                                      | 1,3-Dihydroxy-2,8-dimethoxy-6-methylanthraquinone (219)     | Neuroprotection on glutamate-induced HT22 cell death | Inactive                                                            | 59                                                            |                                                         |
| <i>Colletotrichum</i> JS-0367           | sp.                                                  | <i>Morus alba</i> (mulberry)                                |                                                      |                                                                     |                                                               | 1-Hydroxy-2,3,8-trimethoxy-6-methylanthraquinone (220)  |
|                                         |                                                      |                                                             |                                                      |                                                                     |                                                               | 1,2-Dihydroxy-3,8-dimethoxy-6-methylanthraquinone (221) |
|                                         |                                                      | Evariquinone (222)                                          |                                                      | Strong protective effects                                           |                                                               |                                                         |
| <i>Epicoccum nigrum</i>                 | <i>Entadaabyssinica</i> Steud. ex A. Rich., Fabaceae | Quinizarin (223)                                            | ABTS and DPPH scavenging activities                  | IC <sub>50</sub> , 10.86 and 11.36 μg/mL, respectively              | 30                                                            |                                                         |
| <i>Chaetomium</i> YMF432                | sp.                                                  | <i>Huperzia serrata</i> (Thunb. ex Murray) Trev             | 1-Omethylemodin (224)                                | AChE inhibitory activity                                            | IC <sub>50</sub> , 37.7 ± 1.5 and 37.0 ± 2.9 μM, respectively | 60                                                      |
|                                         |                                                      |                                                             | 5-Methoxy-2-methyl-3-tricosyl-1,4-benzoquinone (225) |                                                                     |                                                               |                                                         |
| <i>Chaetomium</i>                       | sp.                                                  | <i>Huperzia serrata</i> (Thunb.                             | Isosclerone (226)                                    | AChE inhibitory                                                     | AChE inhibition rate less                                     | 29,60                                                   |

|                                    |                                                                                           |  |                                                                                                                                                                                                                                                                     |                                                                                                                                                                                                   |    |
|------------------------------------|-------------------------------------------------------------------------------------------|--|---------------------------------------------------------------------------------------------------------------------------------------------------------------------------------------------------------------------------------------------------------------------|---------------------------------------------------------------------------------------------------------------------------------------------------------------------------------------------------|----|
| YMF432/<br><i>alternate</i>        | <i>Alternaria</i><br><i>ex Murray)</i><br><i>Trev/</i><br><i>Psidium littorale</i> Raddi. |  | activity ,neuroprotection<br>for glutamate<br>induced-PC12 cells injury                                                                                                                                                                                             | than 10% at 100 µg/mL,<br>improving cell viabilities<br>from 65.9 ± 3.9% to 74.6 ±<br>4.0% with 20, 40 and 80 µM                                                                                  |    |
|                                    |                                                                                           |  | Hydroxy-2-[1-hydroxyethyl]-5,7<br>-dimethoxynaphtho[2,3-b]<br>thiophene-4,9-dione ( <b>227</b> )                                                                                                                                                                    | Inactive                                                                                                                                                                                          |    |
| <i>Aspergillus</i><br>(No. GX7-3B) | <i>terreus</i><br><i>Bruguiera gymnoi</i><br><i>hiza</i><br>(Linn.) Savigny               |  | Anhydrojavanicin ( <b>228</b> )<br>8-O-Methyljavanicin ( <b>229</b> )<br>Botryosphaerone D ( <b>230</b> )<br>6-Ethyl-5-hydroxy-3,7-dimethox<br>ynaphthoquinone ( <b>231</b> )                                                                                       | AChE inhibitory activity<br><br><br>Inactive                                                                                                                                                      | 36 |
| <i>Fusarium</i> sp. HP-2           | "Qi-Nan" agarwood                                                                         |  | 3-Demethoxyl-fusarnaphthoqui<br>none B ( <b>232</b> )<br>(2S,3S,4S)-8-Dehydroxy-8-metho<br>xyl-dihydronaphthalenone ( <b>233</b> )                                                                                                                                  | AChE inhibitory activity<br><br>Inhibition ratio of 11.9% at<br>50 µM                                                                                                                             | 37 |
| <i>Talaromyces</i><br>EN-501       | <i>islandicus</i><br><i>Laurencia okamura</i><br><i>i</i>                                 |  | 8-Hydroxyconiothyrinone B<br>( <b>234</b> )<br>8,11-Dihydroxyconiothyrinone<br>B ( <b>235</b> )<br>4R,8-Dihydroxyconiothyrinone<br>B ( <b>236</b> )<br>4S,8-Dihydroxyconiothyrinone<br>B ( <b>237</b> )<br>4S,8-Dihydroxy-10-O-methyliden<br>dryol E ( <b>238</b> ) | Antioxidant activities<br>against DPPH and ABTS<br><br>IC <sub>50</sub> for DPPH: 12, 31, 42, 52<br>and 30 µM, respectively.<br>IC <sub>50</sub> for ABTS: 19, 34, 31<br>and 24 µM, respectively. | 61 |

|                   |                                         |      |                                                    |                                                                                                                                     |                                                             |                                                                 |    |
|-------------------|-----------------------------------------|------|----------------------------------------------------|-------------------------------------------------------------------------------------------------------------------------------------|-------------------------------------------------------------|-----------------------------------------------------------------|----|
|                   | <i>Colletotrichum</i> F168              | sp.  | <i>Huperzia serrata</i> Trev                       | 5-Methoxy-2-methyl-3-pentacyclohexa-2,5-diene-1,4-dione (239)                                                                       | AChE inhibitory activity                                    | Inhibition rate of 10.9% at 100 µg/mL                           | 63 |
| Other polyketides | <i>Colletotrichum gloeosporioides</i>   |      | <i>M. champaca</i>                                 | 2(4-Hydroxyphenyl)acetic acid (240)                                                                                                 | AChE inhibitory activity                                    | Moderate activity at 200 µg                                     | 26 |
|                   |                                         |      |                                                    | 2(2-Hydroxyphenyl)acetic acid (241)                                                                                                 |                                                             |                                                                 |    |
|                   | <i>Penicillium</i> sp.1                 |      | <i>Alibertia macrophylla</i> K. Schum. (Rubiaceae) | Orcinol (242)                                                                                                                       | AChE inhibitory activity                                    | Moderate AChE inhibitory activity                               | 25 |
|                   | <i>Bipolaris sorokiniana</i> LK12       |      | <i>Rhazya stricta</i>                              | Sorokiniol (243)                                                                                                                    | AChE inhibitory activity                                    | EC <sub>50</sub> , 3.402 ± 0.08 µg/mL                           | 43 |
|                   | <i>Botryosphaeria dothidea</i> KJ-1     |      | <i>Melia azedarach</i> L                           | Altenusin (244)<br>5'-Methoxy-6-methylbiphenyl-3,4,3'-triol (245)                                                                   | DPPH radical scavenging activity                            | IC <sub>50</sub> , 17.6 ± 0.23 and 18.7 ± 0.18 µM, respectively | 33 |
|                   | <i>Epicoccum nigrum</i>                 |      | <i>E. abyssinica</i> Steud. ex A. Rich             | Parahydroxybenzaldehyde (246)                                                                                                       | ABTS and DPPH scavenging activities                         | IC <sub>50</sub> , 38.43 ± 4.85 and 49.45 ± 6.52 µg/mL          | 30 |
|                   | <i>Phomopsis</i> sp. xy21               | Thai | <i>Xylocarpus granatum</i>                         | Phomopsol B (247)<br>3-(2,6-Dihydroxyphenyl)-4-hydroxy-6-methylisobenzofuran-1(3H)-one (248)                                        | Neuroprotection on corticosterone induced PC12 cells injury | Inactive<br>Improving cell viabilities for 96% at 40.0 µM       | 38 |
|                   | <i>Penicillium chermesinum</i> (ZH4-E2) |      | <i>Kandelia candel</i>                             | 6'-O-Odesmethylterphenyllin (249)<br>3-Hydroxy-6'-O-desmethylterphenyllin (250)<br>3,3''-Dihydroxy-6'-O-desmethylterphenyllin (251) | AChE inhibitory activity                                    | IC <sub>50</sub> > 100 µM                                       | 57 |

|                                   |                                                |                                                             |                                                          |                                                    |        |
|-----------------------------------|------------------------------------------------|-------------------------------------------------------------|----------------------------------------------------------|----------------------------------------------------|--------|
|                                   |                                                | 3''-Deoxy-6'-O-desmethylcandidusin B (252)                  |                                                          | IC <sub>50</sub> , 7.8 and 5.2 μM, respectively    |        |
|                                   |                                                | 6'-O-desmethylcandidusin B (253)                            |                                                          |                                                    |        |
|                                   |                                                | Flavipin (254)                                              | AChE inhibitory activity                                 | Inhibition ratio < 10% at 50 μM                    |        |
|                                   |                                                | Epicoccone (255)                                            | —                                                        | —                                                  |        |
| <i>Chaetomium globosum</i>        | <i>Panax notoginseng</i>                       | 3-Methoxyepicoccone (256)                                   |                                                          | Inhibition ratio of 72.6% at 50 μM                 | 17     |
|                                   |                                                | Epicocolide A (257)                                         | AChE inhibitory activity                                 | Inhibition ratio < 10% at 50 μM                    |        |
|                                   |                                                | Epicocolide B (258)                                         |                                                          | IC <sub>50</sub> , 5.55 μM                         |        |
|                                   |                                                | Butyrolactone I (259)                                       |                                                          | IC <sub>50</sub> > 100 μg/mL                       |        |
|                                   |                                                | Ulocladol diacetate (260)                                   | AChE inhibitory activity                                 | IC <sub>50</sub> , 83 and 37 μg/mL, respectively   |        |
|                                   |                                                | Ulocladol triacetate (261)                                  |                                                          |                                                    |        |
| <i>Microsphaeropsis olivacea</i>  | <i>Pilgerodendron uviferum</i> (D. Don) Florin | 2,5-Diacetylphenol (262)                                    |                                                          |                                                    | 52     |
|                                   |                                                | 7-Hydroxy-2,4dimethyl-3(2H)-benzofuranone (263)             | —                                                        | —                                                  |        |
|                                   |                                                | Enalin[2,7-dihydroxy-2,4-dimethyl-3(2H)-benzofuranone (264) | AChE inhibitory activity                                 | IC <sub>50</sub> , 89 μg/mL                        |        |
|                                   |                                                | Corynesidone A (265)                                        |                                                          | IC <sub>50</sub> > 250 μM                          |        |
| <i>Corynespora cassiicola</i> L36 | <i>Lindenbergi philippensis</i> (Cham.) Benth  | Corynesidone B (266)                                        | DPPH activity                                            | IC <sub>50</sub> , 22.4 and 182.4 μM, respectively | 63     |
|                                   |                                                | Corynether A (267)                                          |                                                          |                                                    |        |
|                                   |                                                | A diaryl ether (268)                                        | MPP <sup>+</sup> -induced oxidative damage in PC12 cells | Improving cell viability                           | 63, 64 |
| <i>Penicillium citrinum</i>       | <i>Bruguiera gymnorrhiza</i>                   | (Z)-7,40-dimethoxy-6-hydroxy-a                              | MPP <sup>+</sup> -induced oxidative                      | Improving cell viability and                       | 64     |



|                                  |                                                 |                                                                                              |                                           |                                                                                                                      |        |
|----------------------------------|-------------------------------------------------|----------------------------------------------------------------------------------------------|-------------------------------------------|----------------------------------------------------------------------------------------------------------------------|--------|
|                                  |                                                 | urone-4-O-b-glucopyranoside (269)                                                            | damage in PC12 cells                      | mitochondrial membrane potential, inhibiting caspase-3 and caspase-9 expression and reducing DNA fragments formation |        |
|                                  |                                                 | (1S,3R,4S)-1-(40-hydroxyl-phenyl)-3,4-dihydro-3,4,5-trimethyl-1H-2-benzopyran-6,8-diol (270) |                                           | Neuroprotective activity                                                                                             |        |
| <i>Pestalotiopsis microspora</i> | <i>Terminalia morobensis</i>                    | Isopestacin (271)                                                                            | Hydroxyl free radical scavenging activity | Scavenging OH <sup>•</sup> at 0.22 mM                                                                                | 65     |
| <i>Cochliobolus kusanoi</i>      | <i>Nerium oleander</i> L                        | Oosporein (272)                                                                              | DPPH scavenging activity                  | 50% scavenging activity at 0.194 mM                                                                                  | 66     |
| <i>Sporothrix</i> sp. (#4335)    |                                                 | Sporothrin A (273)                                                                           | AChE inhibitory activity                  | IC <sub>50</sub> , 1.05 µM                                                                                           | 67, 68 |
|                                  |                                                 | Sporothrin B (274)                                                                           |                                           |                                                                                                                      |        |
|                                  |                                                 | Sporothrin C (275)                                                                           | –                                         | –                                                                                                                    |        |
|                                  |                                                 | Sporothrin C (276)                                                                           |                                           |                                                                                                                      | 67     |
|                                  |                                                 | 1-Hydroxy 8-Methoxy-naphthalene (277)                                                        | AChE inhibitory activity                  | Inactive                                                                                                             |        |
|                                  |                                                 | 1,8-Dimethoxy-naphthalene (278)                                                              |                                           |                                                                                                                      |        |
| <i>Alternaria</i> sp             | <i>Maianthemum bifolium</i>                     | Bialternacin B (279)                                                                         |                                           | Inactive                                                                                                             | 56     |
|                                  |                                                 | Bialternacin C (280)                                                                         | AChE inhibitory activity                  |                                                                                                                      |        |
|                                  |                                                 | Bialternacin D (281)                                                                         |                                           | IC <sub>50</sub> , 68.3µM                                                                                            |        |
| <i>Phomopsis</i> sp. NXZ-05      | <i>Camptotheca acuminata</i> DECNE. (Nyssaceae) | 8-O-acetylmultiploide A (282)                                                                |                                           | IC <sub>50</sub> , 1.19 mg/mL                                                                                        | 69     |
|                                  |                                                 | 8-O-acetyl-5,6-dihydro-5,6-epoxymultiploide A (283)                                          | AChE inhibitory activity                  | IC <sub>50</sub> > 10 mg/mL                                                                                          |        |

|                                            |                              |                                                          |                                                               |                                                                                              |    |
|--------------------------------------------|------------------------------|----------------------------------------------------------|---------------------------------------------------------------|----------------------------------------------------------------------------------------------|----|
|                                            |                              | 5,6-Dihydro-5,6-epoxymultiplolide A (284)                |                                                               |                                                                                              |    |
|                                            |                              | 3,4-Deoxy-3,4-didehydromultiplolide A (285)              |                                                               |                                                                                              |    |
|                                            |                              | (4E)-6,7,9-Trihydroxydec-4-enoic acid (286)              | –                                                             | –                                                                                            |    |
|                                            |                              | Methyl (4E)-6,7,9-trihydroxydec-4-enoate (287)           |                                                               |                                                                                              |    |
|                                            |                              | Multiplolide A (288)                                     | AChE inhibitory activity                                      | IC <sub>50</sub> > 10 mg/mL                                                                  |    |
|                                            |                              | 5R-Hydroxyrecifeiolide (289)                             |                                                               |                                                                                              |    |
|                                            |                              | 5S-Hydroxyrecifeiolide (290)                             |                                                               |                                                                                              |    |
|                                            |                              | ent-Cladospolide F (291)                                 |                                                               |                                                                                              |    |
| <i>Cladosporium cladosporioides</i> MA-299 | <i>Bruguiera gymnorrhiza</i> | Cladospolide G (292)                                     | AChE inhibitory activity                                      | IC <sub>50</sub> > 50 µM                                                                     | 70 |
|                                            |                              | Cladospolide H (293)                                     |                                                               |                                                                                              |    |
|                                            |                              | iso-Cladospolide B (294)                                 |                                                               |                                                                                              |    |
|                                            |                              | Pandangolide 1 (295)                                     |                                                               | IC <sub>50</sub> , 40.26 µM.                                                                 |    |
| <i>Aspergillus flavus</i>                  | <i>Corallina officinalis</i> | (8E,12Z)-10,11-Dihydroxyoctadeca-8,12-dienoic acid (296) | AChE inhibitory activity                                      | Inhibitory rate of 10.3% at 100 µg/mL                                                        | 71 |
| <i>Curvularia</i> sp. T12                  | <i>Rauwolfia macrophylla</i> | 2'-Deoxyribolactone (297)                                | AChE inhibitory activity                                      | IC <sub>50</sub> , 1.93 and 1.54 µM, respectively                                            | 72 |
|                                            |                              | Hexylitaconic acid (298)                                 |                                                               |                                                                                              |    |
| <i>Talaromyces aurantiacus</i>             |                              | Talaromycin A (299)                                      | AChE inhibitory activity                                      | IC <sub>50</sub> , 12.63 µM                                                                  | 73 |
|                                            |                              | Talaromycin B (300)                                      |                                                               | Inactive                                                                                     |    |
| <i>Curvularia</i> sp.G6-32                 | <i>Sapindus sap-onaria</i> L | E-G6-32 (301)                                            | AChE inhibitory activity, DPPH and ABTS scavenging activities | IC <sub>50</sub> > 350 µg/mL for AChE inhibition, inhibition values of 22.5% to the DPPH and | 74 |

|                              |                                 |                                                             |                                                                    |                                                                                                        |
|------------------------------|---------------------------------|-------------------------------------------------------------|--------------------------------------------------------------------|--------------------------------------------------------------------------------------------------------|
|                              |                                 |                                                             |                                                                    | 62.7% to the ABTS                                                                                      |
| <i>Daldinia</i> sp.TJ403-LS1 | <i>Anoectochilus roxburghii</i> | Daldiniol A (302)                                           | BChE inhibitory activity                                           | IC <sub>50</sub> > 200 µM                                                                              |
|                              |                                 | Daldiniol B (303)                                           |                                                                    |                                                                                                        |
|                              |                                 | Daldiniol C (304)                                           |                                                                    |                                                                                                        |
|                              |                                 | Daldiniol D (305)                                           |                                                                    |                                                                                                        |
|                              |                                 | 4-Hydroxy-3-(3-methylbut-3-en-1-ynyl)benzyl alcohol (306)   | BChE inhibitory activity                                           | IC <sub>50</sub> , 6.93 ± 0.71 and 16.00 ± 0.30 µM, respectively                                       |
|                              |                                 | Methoxy-3-(3-methylbut-3-en-1-ynyl)benzyl alcohol (307)     |                                                                    |                                                                                                        |
|                              |                                 | Daldiniol E (308)                                           | BChE inhibitory activity                                           | IC <sub>50</sub> > 200µM                                                                               |
|                              |                                 | Daldiniol F (309)                                           |                                                                    | IC <sub>50</sub> , 23.33 ± 0.55 and 15.53 ± 0.39 µM, respectively                                      |
|                              |                                 | Daldiniol G (310)                                           |                                                                    |                                                                                                        |
| <i>Saccharicola</i> sp       | <i>Eugenia jambolana</i>        | Speciosin U (311)                                           | huAChE-ICER and eeAChE-ICER inhibitory activity                    | IC <sub>50</sub> , 0.076 ± 0.01 and 0.0047 ± 0.0009 mg/mL, respectively                                |
|                              |                                 | Speciosin V (312)                                           |                                                                    | Inactive                                                                                               |
|                              |                                 | Speciosin W (313)                                           |                                                                    |                                                                                                        |
|                              |                                 | 4-Hydroxy-3-(3'-methylbut-3'-en-1'-ynyl)-benzoic acid (314) |                                                                    |                                                                                                        |
|                              |                                 | 4-Hydroxy-3-prenyl-benzoic acid (315)                       |                                                                    |                                                                                                        |
| <i>Alternaria alternate</i>  | <i>Psidium littorale</i> Raddi  | Alternin A (316)                                            | Neuroprotective activity against glutamate-induced PC12 cell death | Improving cell viabilities with the values ranging from 64.7 ± 4.9% to 72.3 ± 4.5 at 20, 40 and 80 µM. |
|                              |                                 | Stemphyperyleneol (317)                                     |                                                                    | Inactive                                                                                               |
|                              |                                 | 3(ζ)Hydroxy-octadeca-4(E),6(Z)-                             |                                                                    |                                                                                                        |

58

29

|                                        |                                         |                               |                                     |                                                                            |                                                         |    |  |
|----------------------------------------|-----------------------------------------|-------------------------------|-------------------------------------|----------------------------------------------------------------------------|---------------------------------------------------------|----|--|
|                                        |                                         |                               | dienoic acid (318)                  |                                                                            |                                                         |    |  |
|                                        |                                         |                               | <i>E</i> -7,9-diene-11-methenyl     |                                                                            |                                                         |    |  |
|                                        |                                         |                               | palmitic acid (319)                 |                                                                            |                                                         |    |  |
|                                        |                                         |                               | <i>p</i> -Hydroxybenzoic acid (320) |                                                                            |                                                         |    |  |
|                                        |                                         |                               | Benzoic acid (321)                  |                                                                            |                                                         |    |  |
| <i>Trematosphaeria terricola</i>       | <i>Artemisia desertorum</i>             |                               | Trematosphone A (322)               | Neuroprotective effect against corticosterone-induced injury in PC12 cells | Neuroprotection at 6.25 $\mu$ M                         | 76 |  |
|                                        |                                         |                               | Trematosphone B (323)               |                                                                            | Inactive                                                |    |  |
| <i>Phyllosticta capitalensis</i>       | <i>Loropetalum chinense</i> var. rubrum |                               | Guignardianone G (324)              | Neuroprotective activities on glutamate-induced PC12 cells injury          | No neuroprotective activity at 40 $\mu$ M               |    |  |
|                                        |                                         |                               | Xenofuranone B (325)                |                                                                            | Weak cytotoxicity at 40 $\mu$ M                         | 77 |  |
|                                        |                                         |                               | Linoleic acid (326)                 |                                                                            | EC <sub>50</sub> , 33.9 $\mu$ M                         |    |  |
|                                        |                                         |                               | 2-Hexenoic acid (327)               |                                                                            | Weak cytotoxicity at 40 $\mu$ M                         |    |  |
| <i>Cochliobolus lunatus</i> SCSIO41401 |                                         |                               | Phthalide glycerol ether (328)      | AChE inhibitory activity                                                   | IC <sub>50</sub> , 2.5 $\pm$ 0.21 $\mu$ M               | 40 |  |
| <i>Phoma</i> sp. YN02-P-3              |                                         |                               | Phomeketale A (329)                 |                                                                            |                                                         |    |  |
|                                        |                                         |                               | Phomeketale B (330)                 |                                                                            | IC <sub>50</sub> > 100 $\mu$ M                          |    |  |
|                                        |                                         |                               | Phomeketale C (331)                 | AChE inhibitory activity                                                   | IC <sub>50</sub> , 40.0 $\mu$ M                         | 78 |  |
|                                        |                                         |                               | Phomeketale D (332)                 |                                                                            |                                                         |    |  |
|                                        |                                         |                               | Phomeketale E (333)                 |                                                                            | IC <sub>50</sub> > 100 $\mu$ M                          |    |  |
|                                        |                                         |                               | Phomeketale F (334)                 |                                                                            |                                                         |    |  |
| <i>Penicillium</i> sk14JW2P            | sp. DRUCE                               | <i>Kandelia candel</i> (L.)   | 13-Hydroxypalitantin (335)          | AChE inhibitory activity                                                   | IC <sub>50</sub> , 12 $\pm$ 0.3 and 79 nM, respectively | 79 |  |
|                                        |                                         |                               | (+)-Palitantin (336)                |                                                                            |                                                         |    |  |
| <i>Aspergillus</i> sp. xy02            |                                         | <i>Xylocarpus moluccensis</i> | (7R,10S)-7,10-Epoxyisodonic acid    | DPPH scavenging                                                            | Inactive                                                | 80 |  |

|                              |                         |                                                         |                          |                            |    |
|------------------------------|-------------------------|---------------------------------------------------------|--------------------------|----------------------------|----|
|                              |                         | (337)                                                   | activity                 |                            |    |
|                              |                         | (7S,10S)-7,10-Epoxy-sydonic acid                        |                          |                            |    |
|                              |                         | (338)                                                   |                          |                            |    |
|                              |                         | (7R,11S)-7,12-Epoxy-sydonic acid                        |                          |                            |    |
|                              |                         | (339)                                                   |                          |                            |    |
|                              |                         | (7S,11S)-7,12-Epoxy-sydonic acid                        |                          |                            |    |
|                              |                         | (340)                                                   |                          |                            |    |
|                              |                         | 7-Deoxy-7,14-didehydro-12-hydroxy-sydonic acid (341)    |                          |                            |    |
|                              |                         | (Z)-7-Deoxy-7,8-didehydro-12-hydroxy-sydonic acid (342) |                          |                            |    |
|                              |                         | (E)-7-Deoxy-7,8-didehydro-12-hydroxy-sydonic acid (343) |                          |                            |    |
|                              |                         | (+)-1-Hydroxyboivinianic acid (344)                     |                          |                            |    |
|                              |                         | Engyodontiumone I (345)                                 |                          |                            |    |
|                              |                         | (+)-Sydonic acid (346)                                  |                          |                            |    |
|                              |                         | (+)-Hydroxy-sydonic acid (347)                          |                          |                            |    |
|                              |                         | (-)-(7S)-10-Hydroxy-sydonic acid (348)                  |                          | IC <sub>50</sub> , 72.1 μM |    |
| <i>Phaeosphaeria</i> sp. LF5 | <i>Huperzia serrata</i> | 3-(Hydroxymethyl)-5-methylfuran-2(5H)-one (349)         |                          |                            |    |
|                              |                         | Aspilactonol G (350)                                    | AChE inhibitory activity | Inactive at 100 μM         | 49 |
|                              |                         | Aspilactonol H (351)                                    |                          |                            |    |
|                              |                         | Aspilactonol I (352)                                    |                          | IC <sub>50</sub> , 6.26 μM |    |

|                                                                                    |                      |  |                                                       |                                  |                                |
|------------------------------------------------------------------------------------|----------------------|--|-------------------------------------------------------|----------------------------------|--------------------------------|
|                                                                                    |                      |  | <i>E</i> - $\Delta^2$ -anhydromevalonic acid<br>(353) | Inactive at 100 $\mu$ M          |                                |
| co-culture of the<br><i>Armillaria</i> sp. and<br><i>Epicoccum</i> sp.<br>YUD17002 |                      |  | Armilliphatic A (354)                                 | IC <sub>50</sub> , 23.85 $\mu$ M | AChE inhibitory activity<br>81 |
|                                                                                    |                      |  | Armilliphatic B (355)                                 |                                  |                                |
|                                                                                    |                      |  | Armilliphatic C (356)                                 | Inactive at 50 $\mu$ M           |                                |
|                                                                                    |                      |  |                                                       |                                  |                                |
| <i>Chaetoiium</i> sp.<br>NF00754                                                   | <i>Pharbitis nil</i> |  | 1-Oxaspiro chaetospirrolactone<br>(357)               | Inactive                         | AChE inhibitory activity<br>82 |
|                                                                                    |                      |  | Orsellide F (358)                                     |                                  |                                |
|                                                                                    |                      |  | Orsellide A (359)                                     | IC <sub>50</sub> , 7.34 $\mu$ M  |                                |
|                                                                                    |                      |  | Globosumone B (360)                                   | Inactive                         |                                |
|                                                                                    |                      |  | Globosumone C (361)                                   | IC <sub>50</sub> , 7.67 $\mu$ M  |                                |

“\_” not test; IC<sub>50</sub>, half maximal effective concentration; EC<sub>50</sub>, half effective concentration; Emax, maximum effect; AChE, acetylcholinesterase; DPPH, 2,2-diphenyl-1-picrylhydrazyl; ABTS, 2,2-azino-bis(3-ethylbenzothiazoline-6-sulfonic acid) diammonium salt.
