# Supplementary material for: Anti-Alzheimer’s Natural Products Derived from Plant Endophytic Fungi
Source: MDPI journal article supplement (doi:10.3390/molecules28052259), 2023-02-28
Supplement: s1 [file s1]

**Table S5.** Steroids from endophytic fungi and their biological activities, metabolite class, fungus, host plant(s), reference.

| Metabolite Class | Fungus                                                                                             | Host Plant(s)                                                                                                                          | Compounds Isolated                                                   | Biological Target        | Biological Activity                    | Reference |
|------------------|----------------------------------------------------------------------------------------------------|----------------------------------------------------------------------------------------------------------------------------------------|----------------------------------------------------------------------|--------------------------|----------------------------------------|-----------|
| Steroids         | <i>Aspergillus oryzae</i>                                                                          | <i>Heterosiphonia japonica</i>                                                                                                         | Asporyergosterol ( <b>440</b> )                                      | AChE inhibitory activity | Inhibition rate of 14.0% at 100 µg/mL  | 98        |
|                  | <i>Aspergillus oryzae</i> /<br><i>Alternaria alternata</i>                                         | <i>Heterosiphonia japonica</i> /<br><i>Psidium littorale</i>                                                                           | (22E,24R)-Ergosta-4,6,8(14),22-tetraen-3-one ( <b>441</b> )          | AChE inhibitory activity | Inhibition rate of 19.8 % at 100 µg/mL | 98, 29    |
|                  | <i>Aspergillus oryzae</i>                                                                          | <i>Heterosiphonia japonica</i>                                                                                                         | (22E,24R)-3β-Hydroxyergosta-5,8,22-trien-7-one ( <b>442</b> )        | AChE inhibitory activity | Inhibition rate of 7.2% at 100 µg/mL   | 98        |
|                  | <i>Aspergillus oryzae</i> /<br><i>Chaetomium</i> sp.<br>M453/ <i>Talaromyces</i><br>sp. SCNU-F0041 | <i>Heterosiphonia japonica</i> /<br><i>Huperzia serrate</i> (Thunb. ex<br>Murry) Trev/ <i>Kandelia</i>                                 | (22E,24R)-Ergosta-7,22-dien-3β,5α,6β-triol ( <b>443</b> )            | AChE inhibitory activity | Inhibition rate of 0.4% at 100 µg/mL   | 98, 100   |
|                  | <i>Aspergillus oryzae</i>                                                                          | <i>Heterosiphonia japonica</i>                                                                                                         | (22E,24R)-5α,8α-Epidioxyergosta-6,22-dien-3β-ol ( <b>444</b> )       | AChE inhibitory activity | Inhibition rate of 8.1% at 100 µg/mL   | 98        |
|                  | <i>Aspergillus flavus</i><br>cf-5                                                                  | <i>Corallina officinalis</i>                                                                                                           | 3β,4α-Dihydroxy-26-methoxyergosta-7,24(28)-dien-6-one ( <b>445</b> ) | AChE inhibitory activity | Inhibition rate of 5.5% at 100 µg/mL   | 71        |
|                  |                                                                                                    |                                                                                                                                        | Episterol ( <b>446</b> )                                             |                          |                                        |           |
|                  | <i>Aspergillus flavus</i><br>cf-5/ <i>Phyllosticta capitalensis</i>                                | <i>Corallina officinalis</i> /<br><i>Huperzia serrate</i> (Thunb. ex Murry)<br>Trev/ <i>Loropetalum chinense</i> var.<br><i>rubrum</i> | (22E,24R)-Ergosta-5,22-dien-3β-ol ( <b>448</b> )                     | –                        | –                                      | 71, 77    |
|                  | <i>Chaetomium</i> sp.                                                                              | <i>Huperzia serrate</i> (Thunb. ex                                                                                                     | Neocyclocitrinol E ( <b>439</b> )                                    | –                        | –                                      | 99        |

|                                                   |                                                                                                    |                                                                     |                          |                                  |                                          |
|---------------------------------------------------|----------------------------------------------------------------------------------------------------|---------------------------------------------------------------------|--------------------------|----------------------------------|------------------------------------------|
| M453                                              | Murry) Trev                                                                                        | Neocyclocitrinol F (450)                                            | AChE inhibitory activity | Inactive                         |                                          |
|                                                   |                                                                                                    | Neocyclocitrinol G (451)                                            |                          | Weak activity at 50 μM           |                                          |
|                                                   |                                                                                                    | 3β-Hydroxy-5,9-epoxy-(22E,24R)-ergosta-7,22-dien-6-one (452)        |                          |                                  |                                          |
|                                                   |                                                                                                    | 453                                                                 |                          | Inactive                         |                                          |
| Chaetomium M453/ <i>Phyllosticta capitalensis</i> | sp. <i>Huperzia serrate</i> (Thunb. ex Murry) Trev/ <i>Loropetalum chinense</i> var. <i>rubrum</i> | 454                                                                 | AChE inhibitory activity | Inactive                         | 99, 77                                   |
| Chaetomium M453                                   | sp. <i>Huperzia serrate</i> (Thunb. ex Murry) Trev                                                 | 455                                                                 | AChE inhibitory activity | Inactive                         | 99                                       |
| Chaetomium YMF432                                 | sp. <i>Huperzia serrata</i> (Thunb. ex Murray) Trev                                                | (3β,5α,6α,22E)-3-Hydroxy-5,6-epoxy7-one-8(14),22-Dien-ergosta (456) | AChE inhibitory activity | IC <sub>50</sub> , 67.8 ± 1.7 μM | Inhibition rate < 60<br>10% at 100 μg/mL |
|                                                   |                                                                                                    | β-Sitostenone (457)                                                 |                          |                                  |                                          |
|                                                   |                                                                                                    | β-Sitosterol (458)                                                  |                          |                                  |                                          |
|                                                   |                                                                                                    |                                                                     |                          |                                  |                                          |
| <i>Aspergillus terreus</i> (No. GX7-3B)           | <i>Bruguiera gymnoiiza</i> (Linn.) Savigny                                                         | 3β,5α-Dihydroxy-(22E,24R)-ergosta-7,22-dien-6-one (459)             | AChE inhibitory activity | Inactive                         | 36                                       |
|                                                   |                                                                                                    | 3β,5α,14α-Trihydroxy-(22E,24R)-ergosta-7, 22-dien-6-one (460)       |                          |                                  |                                          |
|                                                   |                                                                                                    | NGA0187 (461)                                                       |                          | IC <sub>50</sub> , 1.89 μM       |                                          |
|                                                   |                                                                                                    |                                                                     |                          |                                  |                                          |
| <i>Curvularia. Talaromyces</i> SCNU-F0041         | Sp/ <i>Rauwolfia macrophylla/ Kandelia</i>                                                         | Ergosterol (462)                                                    | AChE inhibitory activity | IC <sub>50</sub> , 1.52 μM       | 72                                       |

|                                   |                                                |                                                                                                                               |                                                          |                                                           |     |
|-----------------------------------|------------------------------------------------|-------------------------------------------------------------------------------------------------------------------------------|----------------------------------------------------------|-----------------------------------------------------------|-----|
| <i>Alternaria alternata</i>       | <i>Psidium littorale</i> Raddi                 | (17 <i>R</i> )-4-Hydroxy-17-methylincisterol (463)                                                                            | Neuroprotective activity of glutamate induced-PC12 cells | Inactive at 40 and 80 $\mu$ M                             | 29  |
| <i>Colletotrichum</i> sp. F168    | <i>Huperzia serrata</i> Trev                   | Ergosta-7,22-dien-5,9-epoxy-(22 <i>E</i> ,24 <i>R</i> )-6-one-3-yl acetate (464)                                              | AChE inhibitory activity                                 | Inhibition rate of 18.2% at 100 $\mu$ g/mL                | 62  |
| <i>Talaromyces</i> sp. SCNU-F0041 | <i>Kandelia</i>                                | Cyclosecosteroid A (465)<br>(22 <i>E</i> ,24 <i>R</i> )-5 $\alpha$ ,8 $\alpha$ -Epidioxyergosta-6,22-dien-3 $\beta$ -ol (466) | AChE inhibitory activity                                 | IC <sub>50</sub> , 46 $\mu$ M                             | 100 |
| <i>Phyllosticta capitalensis</i>  | <i>Loropetalum chinense</i> var. <i>rubrum</i> | Citreanthrasteroid A (467)<br>Chaxine C (468)                                                                                 | Neuroprotective effect in PC12 cells injury              | EC <sub>50</sub> , 24.2 $\mu$ M<br>Inactive at 40 $\mu$ M | 77  |

"\_" not test. IC<sub>50</sub>, half maximal effective concentration; Emax, maximum effect; AChE, acetylcholinesterase.
