# Supplementary material for: Anti-Alzheimer’s Natural Products Derived from Plant Endophytic Fungi
Source: MDPI journal article supplement (doi:10.3390/molecules28052259), 2023-02-28
Supplement: s1 [file s1]

**Table S2.** Peptides from endophytic fungi and their biological activities, metabolite class, fungus, host plant(s), reference.

| Metabolite Class | Fungus                                      | Host Plant(s)                                | Compounds Isolated                 | Biological Target                                               | Biological Activity                | Reference |
|------------------|---------------------------------------------|----------------------------------------------|------------------------------------|-----------------------------------------------------------------|------------------------------------|-----------|
| Peptides         | <i>Aspergillus terreus</i> (No. GX7-3B)     | <i>Bruguiera gymnoi</i> hiza (Linn.) Savigny | Beauvericin ( <b>136</b> )         | AChE inhibitory activity                                        | IC <sub>50</sub> , 3.09 μM         | 36        |
|                  |                                             |                                              | Colletotrichamide A ( <b>137</b> ) | Neuroprotection<br>glutamate-mediated<br>HT22 cells injury      | Inactive at 100μM                  |           |
|                  | Colletotrichamide B ( <b>138</b> )          | Cell viability of<br>100% at 100 μM          |                                    |                                                                 |                                    |           |
|                  | <i>Colletotrichum gloeosporioides</i> JS419 |                                              | <i>Suaeda japonica</i> Makino      |                                                                 | Colletotrichamide C ( <b>139</b> ) |           |
|                  |                                             |                                              |                                    |                                                                 | Colletotrichamide D ( <b>140</b> ) |           |
|                  |                                             | Colletotrichamide E ( <b>141</b> )           |                                    |                                                                 | Inactive at 100μM                  |           |
|                  | <i>Bipolaris sorokiniana</i> LK12           | <i>Rhazya stricta</i>                        | BZR-cotoxin I ( <b>142</b> )       | AChE, lipid peroxidation<br>and urease inhibitory<br>activities | Moderate activities                | 43        |
|                  |                                             |                                              | BZR-cotoxin IV ( <b>143</b> )      |                                                                 |                                    |           |
|                  | <i>Cryptosporiopsis</i> sp                  | <i>Viburnum tinus</i>                        | Cryptosporioptide ( <b>144</b> )   | Lipoxygenase enzyme<br>inhibitory activity                      | IC <sub>50</sub> , 49.15 ± 0.17 μM | 44        |

IC<sub>50</sub>, half maximal effective concentration.
